# Supplementary material for: High levels of circulating interferons type I, type II and type III associate with distinct clinical features of active systemic lupus erythematosus
Source: PubMed Central journal article supplement (PMC6489203; doi:10.1186/s13075-019-1878-y), 2019-04-29

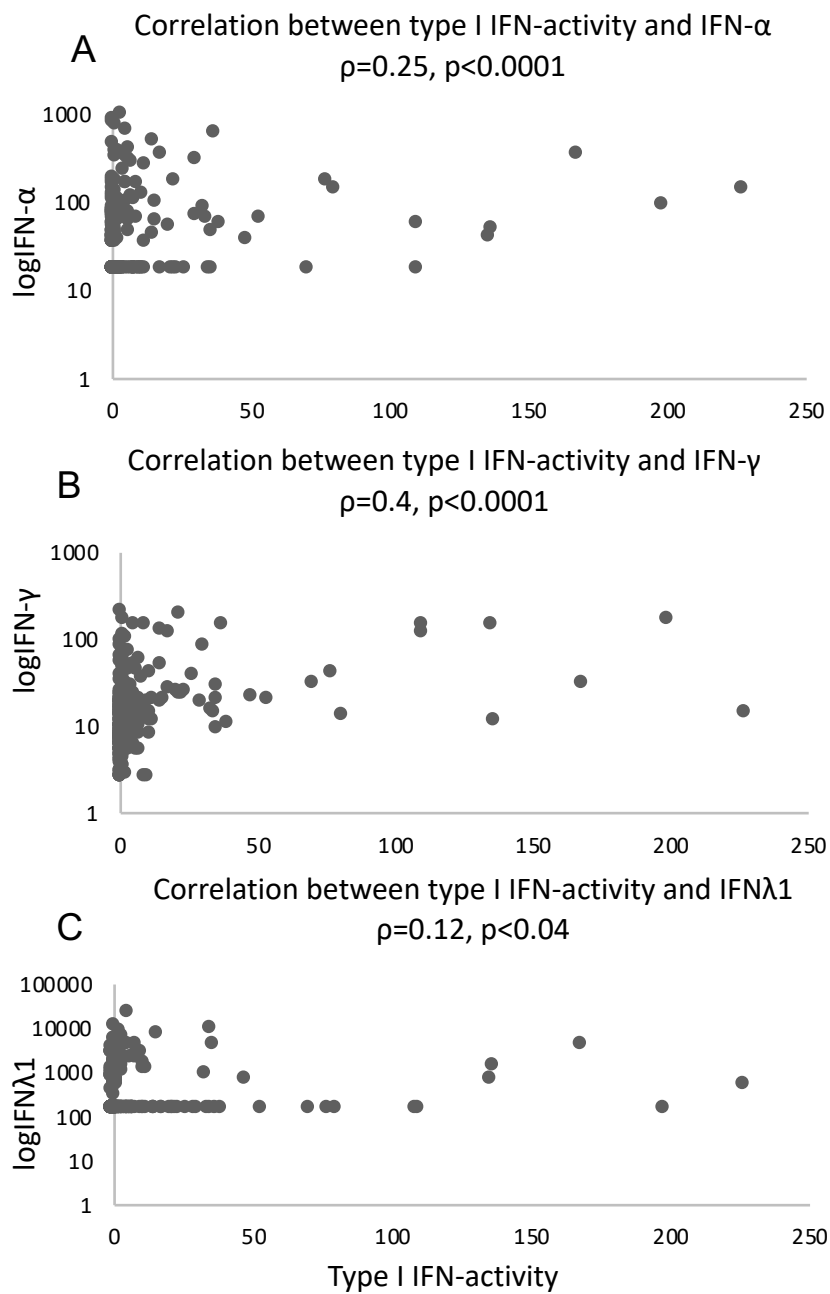

Active manifestations

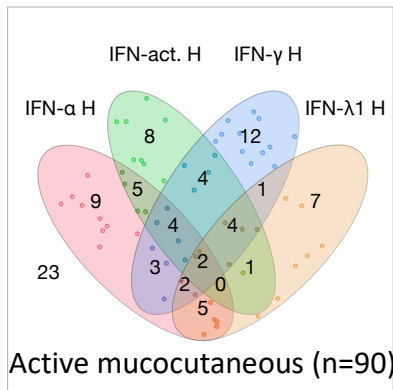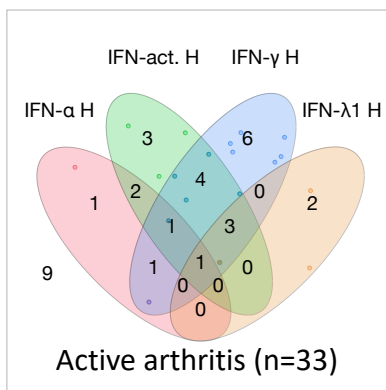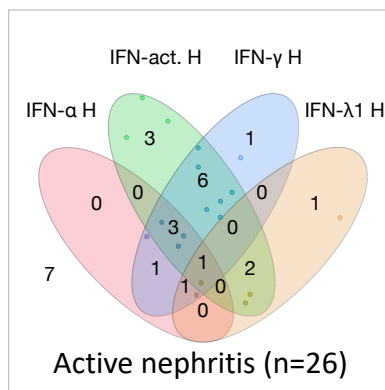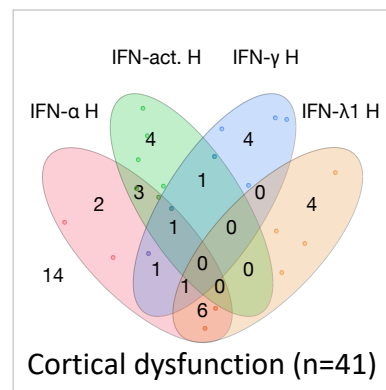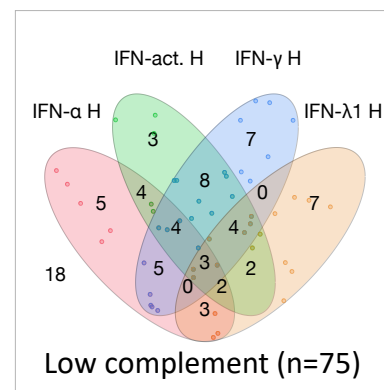

Autoantibodies

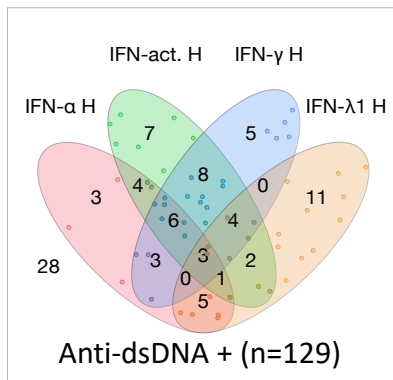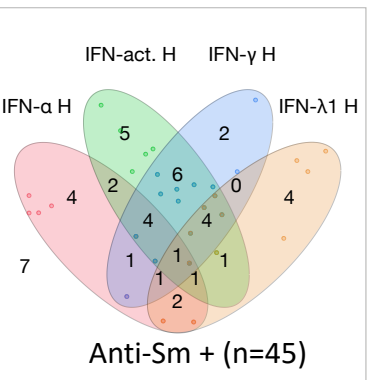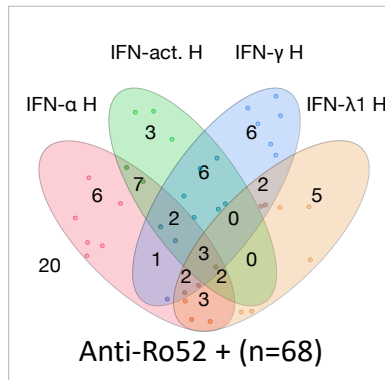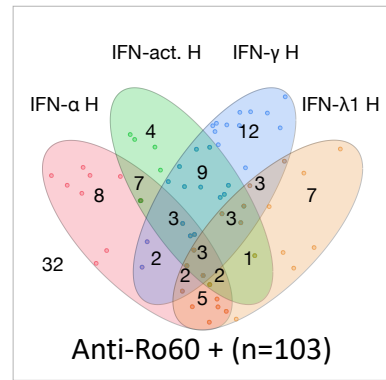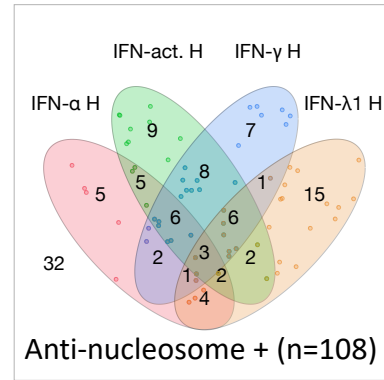

Past manifestations and events

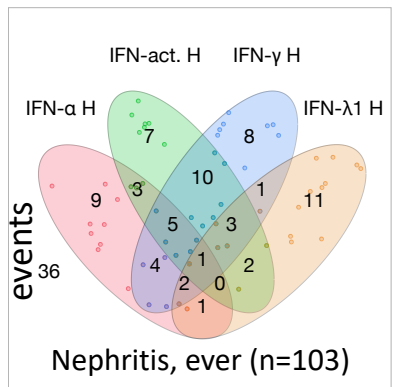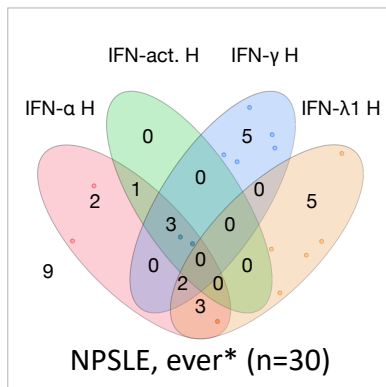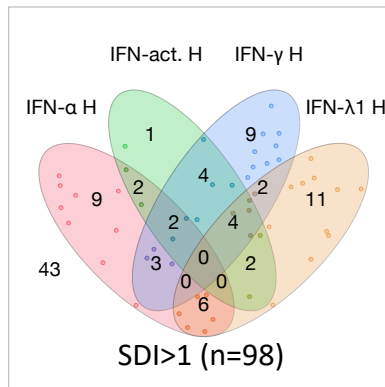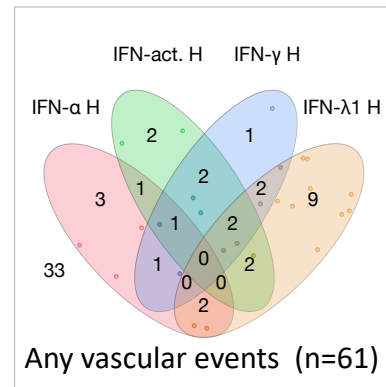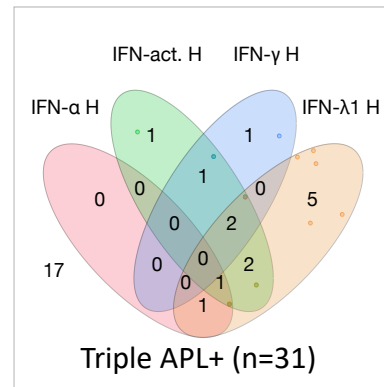

Supplement: 13075_2019_1878_MOESM1_ESM.pdf [file 13075_2019_1878_MOESM1_ESM.pdf]
